# Supplementary material for: The use of percentage change from baseline as an outcome in a controlled trial is statistically inefficient: a simulation study
Source: Springer Nature journal article supplement (doi:10.1186/1471-2288-1-6), 2001-06-28
Supplement: Additional file 1 [file 1471-2288-1-6-s1.doc]

Appendix

Text of simulation

set obs 100

*create a trial with 100 patients

g g=mod(_n,2)

* g=group either 1 or 0

g b=invnorm(uniform())*10

* b is baseline score standard deviation of 10

g y= invnorm(uniform())*10

* y is needed to create a the follow-up score

g r=0.5

* correlation set at 0.5 for this simulation

g a= b*r+y*(1-r^2)^.5

*a is the post treatment score, from baseline score and y

replace a=int(a)+50

replace b=int(b)+50

* give a and b a mean of 50 and use integer values

replace a=a-g*5

*create a treatment effect

g c=b-a

g f=(b-a)/b

*c (CHANGE) is the change score; f (FRACTION) is equivalent to the percent change from baseline

ttest a, by(g)

ttest c, by(g)

ttest f, by(g)

regress a b g

*conduct analyses by each of the four different methods
